# Supplementary material for: Cytokines and Lymphoid Populations as Potential Biomarkers in Locally and Borderline Pancreatic Adenocarcinoma
Source: MDPI journal article supplement (doi:10.3390/cancers14235993), 2022-12-05
Supplement: s1 [file s1]

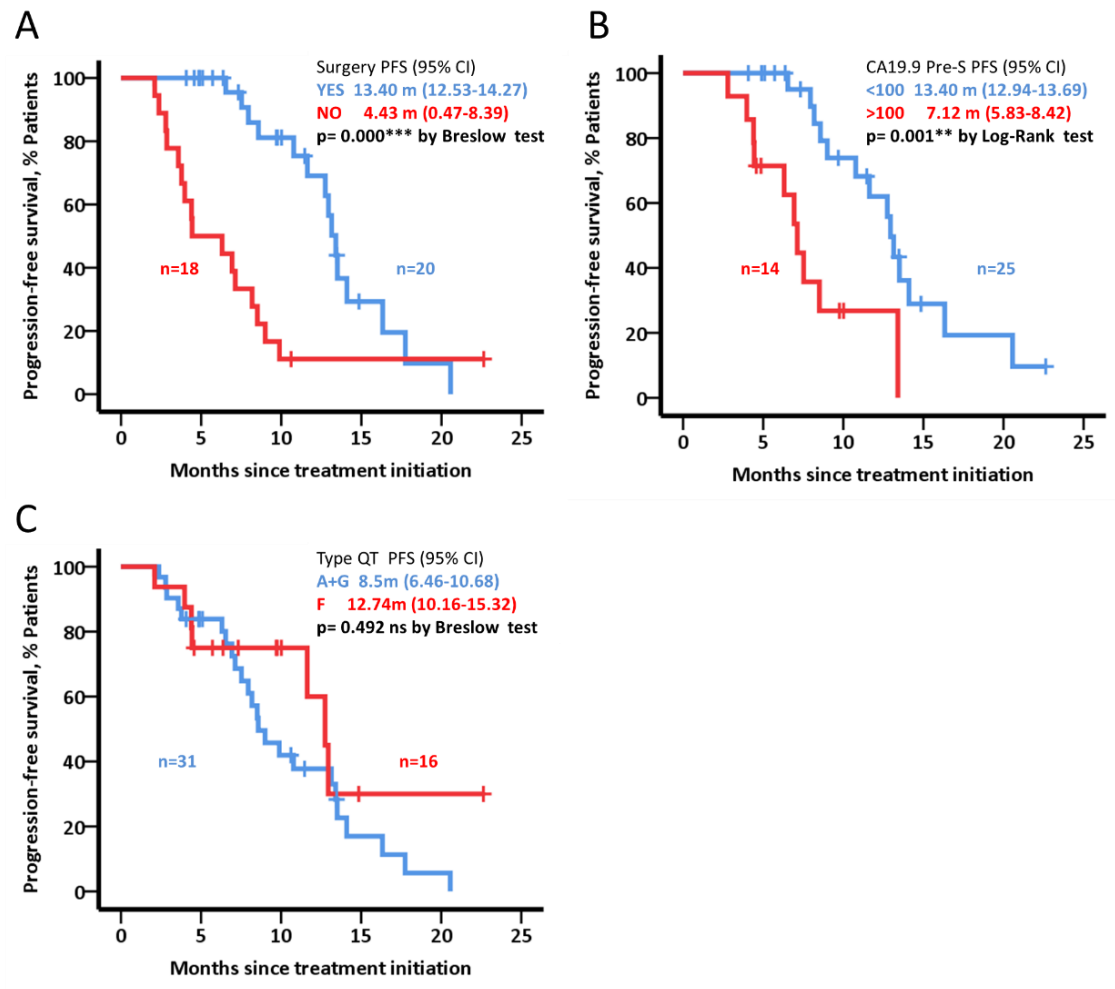

**Supplementary Figure S1: Progression-free survival analysis in BL cohort dichotomized by (A) Surgery, (B) CA19-9 levels before surgery with a cut-off of 100 U/ml and (C) type of chemotherapy received being A+G nab-paclitaxel and gemcitabine and F, FOLFIRINOX regimens. Breslow or Log-rank test were used to test for statistical significance. \*\*, \*\*\* in the figures indicate very significant ( $p < 0.01$ ) and highly significant ( $p < 0.001$ ) statistical differences respectively. Ns, no significant differences ( $p > 0.05$ ).**
