# Supplementary material for: Cytokines and Lymphoid Populations as Potential Biomarkers in Locally and Borderline Pancreatic Adenocarcinoma
Source: MDPI journal article supplement (doi:10.3390/cancers14235993), 2022-12-05
Supplement: s1 [file s1]

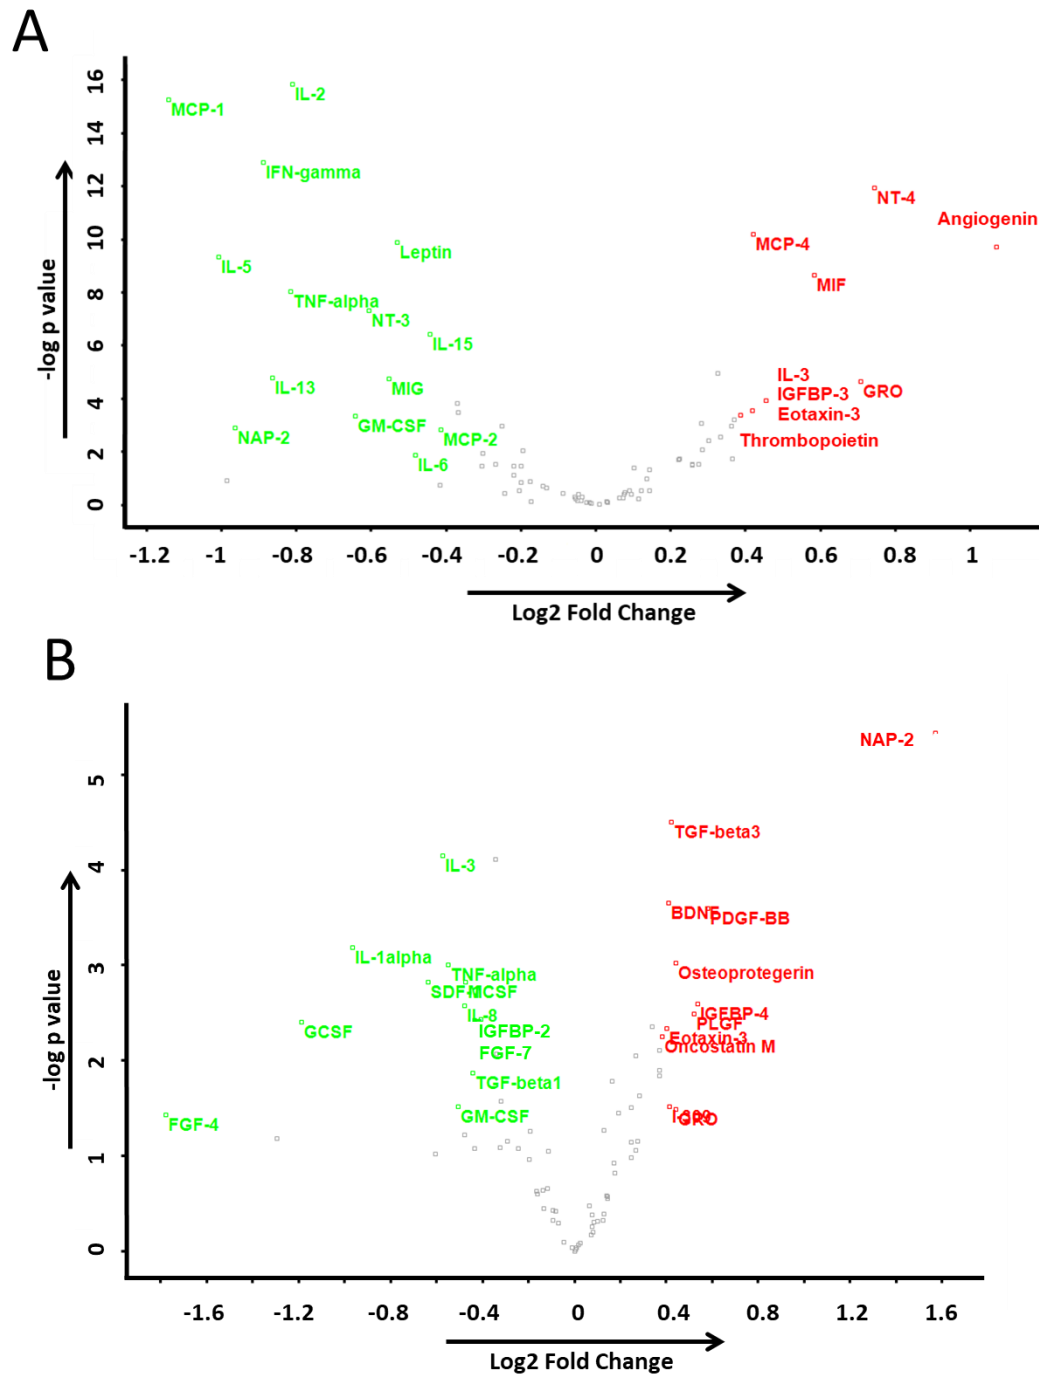

**Supplementary Figure S2: Volcano plot represents the differential cytokines in baseline serum between A) patients (n=59) and healthy donors (n=22) and B) BL (n=44) and resectable patients (n=15).** Volcano plot represents the log2 fold-change of differential cytokine expression between BL and resectable patients with associated  $-\log p$ -values. Green dots underexpressed proteins and red dots overexpressed proteins. Differential proteins were identified as  $p < 0.05$  and  $FC > 30\%$ .
