# Supplementary material for: Cytokines and Lymphoid Populations as Potential Biomarkers in Locally and Borderline Pancreatic Adenocarcinoma
Source: MDPI journal article supplement (doi:10.3390/cancers14235993), 2022-12-05
Supplement: s1 [file s1]

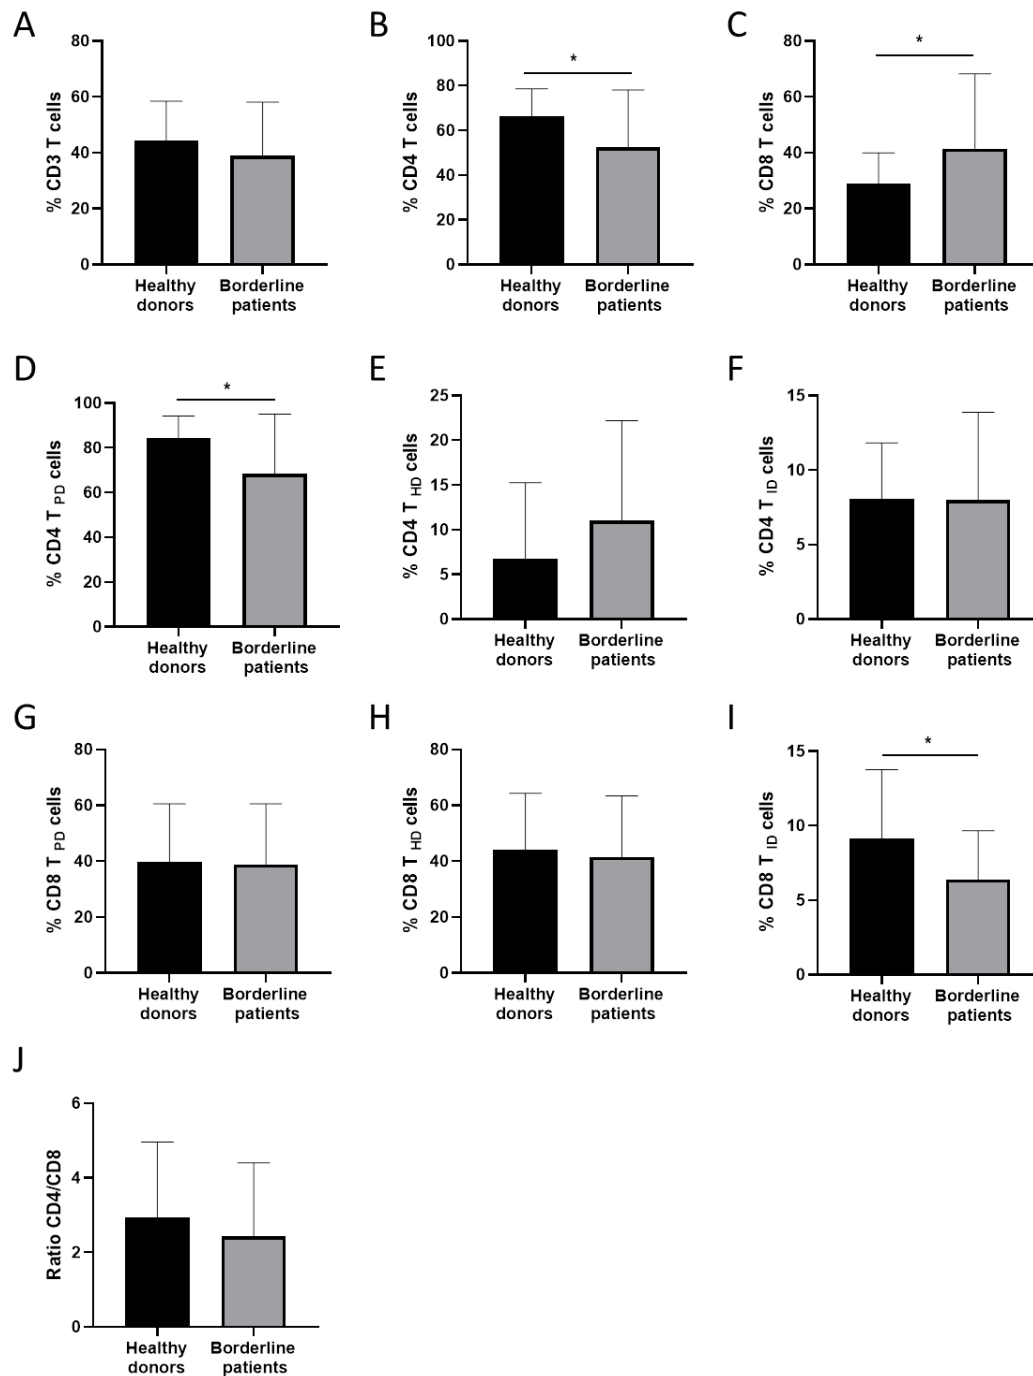

**Supplementary Figure S3: Baseline profiling of CD3, CD4 and CD8 T cell populations, together with differentiation subset according to CD27/CD28 expression in healthy donors (n=22) and BL patients (n=21).** (A) CD3<sup>+</sup> cells, (B) CD4<sup>+</sup> cells, (C) CD8<sup>+</sup> cells, (D) CD4 T<sub>PD</sub> cells, (E) CD4 T<sub>HD</sub> cells, (F) CD4 T<sub>ID</sub> cells, (G) CD8 T<sub>PD</sub> cells, (H) CD8 T<sub>HD</sub> cells, (I) CD8 T<sub>ID</sub> cells, and (J) CD4/CD8 ratio are shown in the figure. Data represented as mean  $\pm$  s.d. \*, in the figures indicate significant ( $p < 0.05$ ).
