# Supplementary material for: Cytokines and Lymphoid Populations as Potential Biomarkers in Locally and Borderline Pancreatic Adenocarcinoma
Source: MDPI journal article supplement (doi:10.3390/cancers14235993), 2022-12-05
Supplement: s1 [file s1]

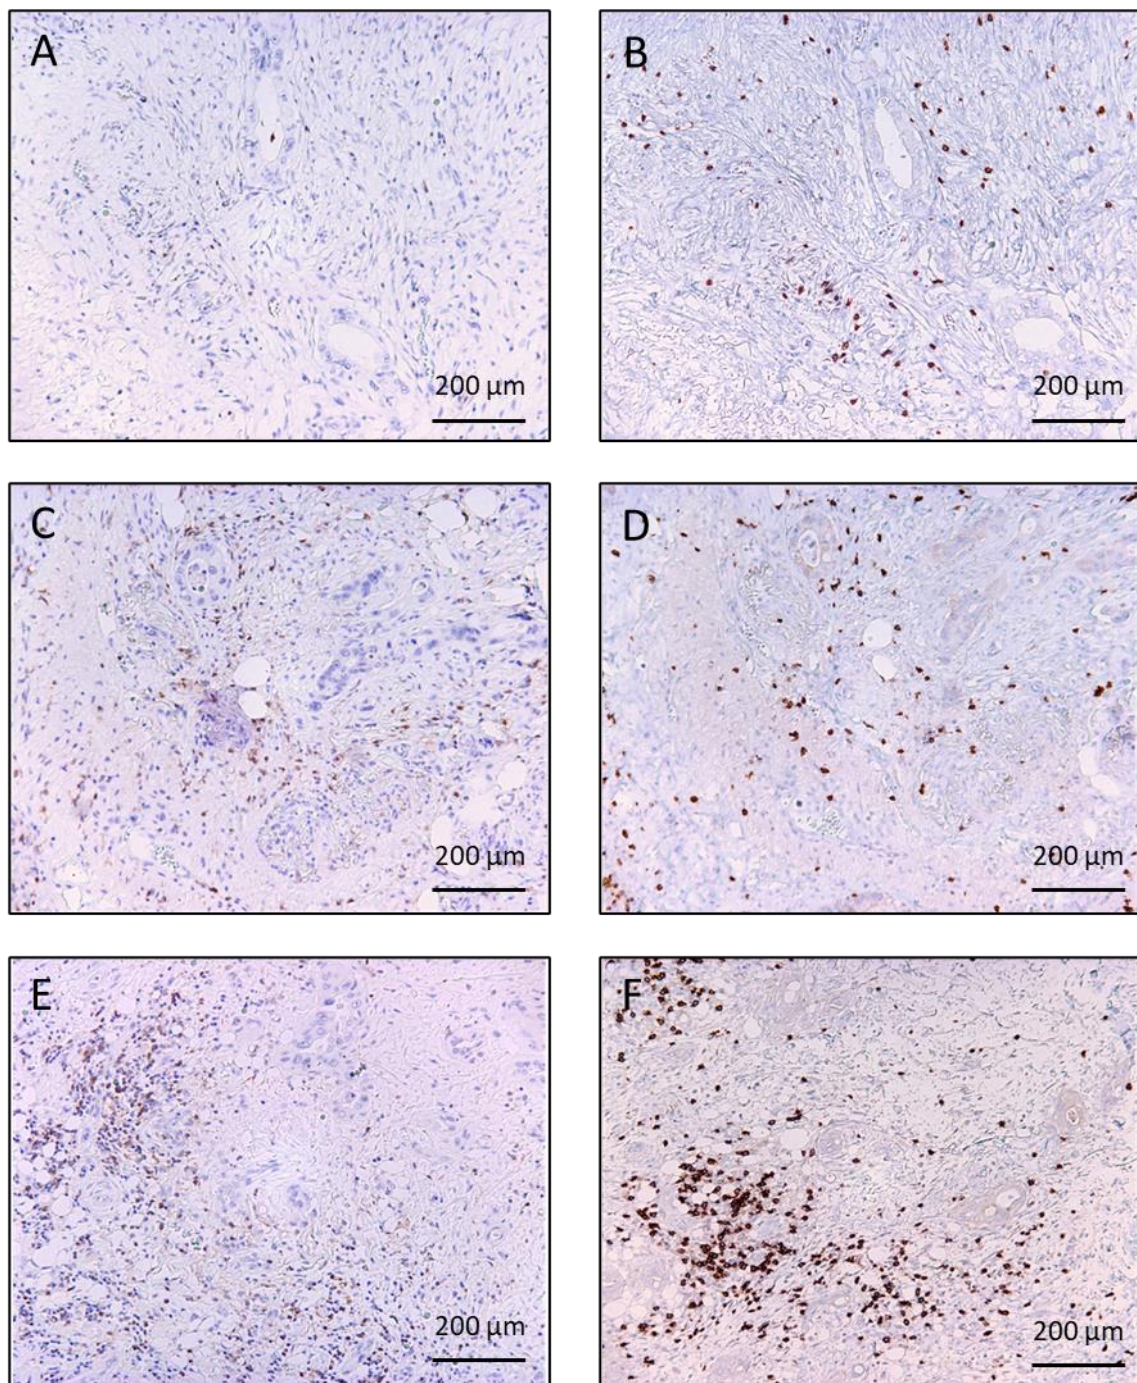

**Supplementary Figure S5: Immunohistochemical staining of CD4+ T and CD8+ T cells in tumor tissue of BL cohort (n=19).** A-B represent images from patient cases with low infiltration, C-D intermediate and E-F high infiltration of lymphocytes. The images on the left represent CD4 stains and CD8 staining on the right. All images were captured with 10x objective.
