# Supplementary material for: Cytokines and Lymphoid Populations as Potential Biomarkers in Locally and Borderline Pancreatic Adenocarcinoma
Source: MDPI journal article supplement (doi:10.3390/cancers14235993), 2022-12-05
Supplement: s1 [file s1]

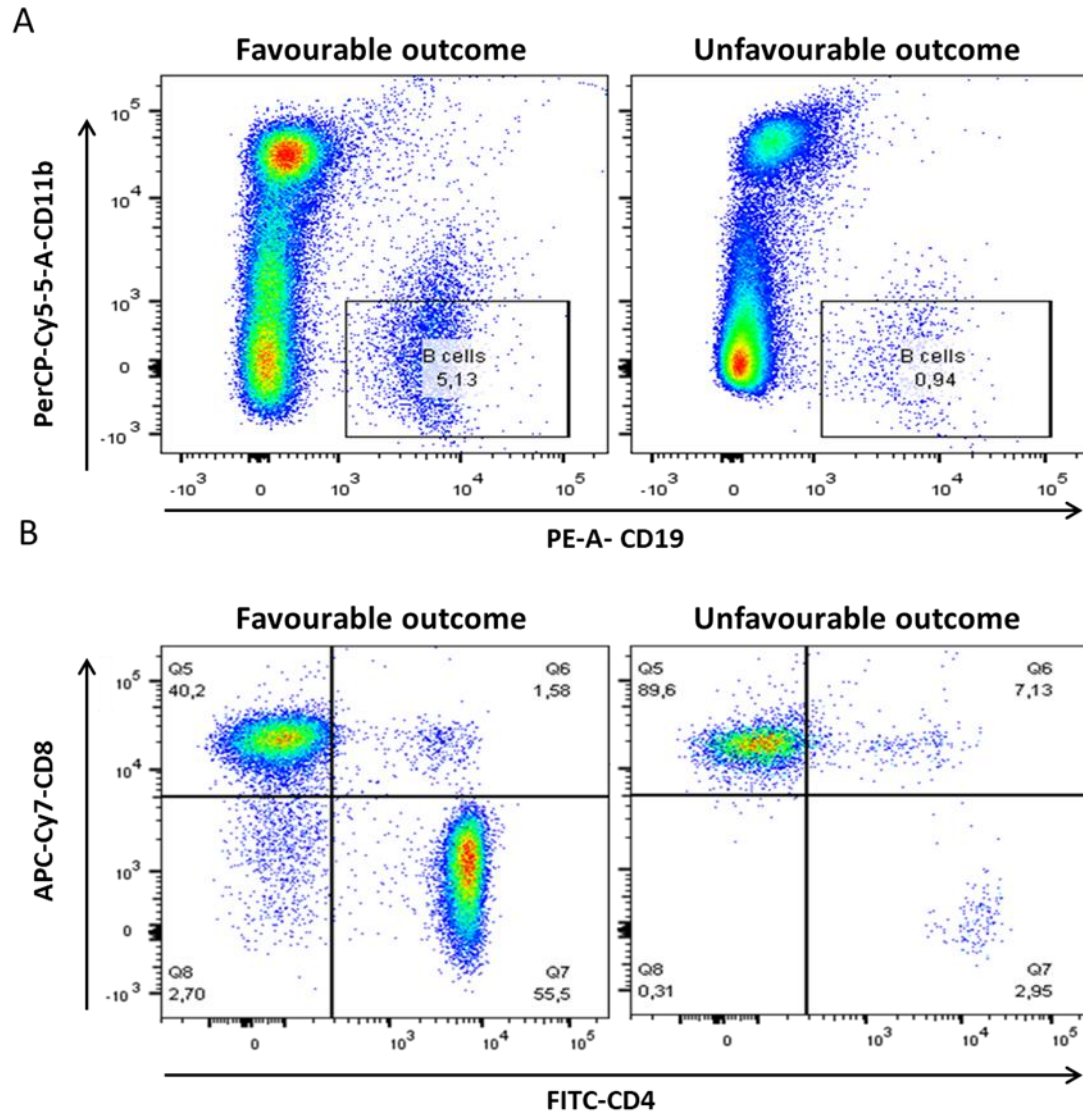

**Supplementary Figure S4: Representative flow cytometry density plots showing the percentage of B cells (A) and CD4 and CD8 cells (B) at baseline comparing patients with favorable and unfavorable outcomes.**
