# Supplementary material for: Cytokines and Lymphoid Populations as Potential Biomarkers in Locally and Borderline Pancreatic Adenocarcinoma
Source: MDPI journal article supplement (doi:10.3390/cancers14235993), 2022-12-05
Supplement: s1 [file s1]

**Supplementary Table S2: KM clusters data for PFS and OS scores in BL cohort.**

|     | Cytokine  | Better (0 points (n, %)) | Worse (1 point (n, %)) | KM clusters                      |
|-----|-----------|--------------------------|------------------------|----------------------------------|
| PFS | IL-10     | Low (23, 52.27%)         | High (21, 47.72%)      | ≤1 (better) vs >1 (worse) points |
|     | MDC       | Low (23, 52.27%)         | High (21, 47.72%)      |                                  |
|     | MIF       | Low (24, 54.54%)         | High (20, 45.45%)      |                                  |
|     | Eotaxin-3 | High (23, 52.27%)        | Low (21, 47.72%)       |                                  |
| OS  | Eotaxin-3 | High (23, 52.27%)        | Low (21, 47.72%)       | 0 (better) vs >1 (worse) points  |
|     | NT-3      | High (23, 52.27%)        | Low (21, 47.72%)       |                                  |
|     | FGF-9     | Low (23, 52.27%)         | High (21, 47.72%)      |                                  |
|     | IP-10     | Low (21, 47.72%)         | High (23, 52.27%)      |                                  |
