# Supplementary material for: Cytokines and Lymphoid Populations as Potential Biomarkers in Locally and Borderline Pancreatic Adenocarcinoma
Source: MDPI journal article supplement (doi:10.3390/cancers14235993), 2022-12-05
Supplement: s1 [file s1]

**Supplementary Table S3: Baseline correlation between systemic levels of B cells, CD4/CD8 ratio and serum cytokine expression at baseline time point (n=27, 21 BL and 6 R). \*  $p<0.05$ , \*\*  $p<0.01$ , \*\*\*  $p<0.001$  and \*\*\*\*  $p<0.0001$ .**

| B cells vs       | r       | 95% confidence interval | R squared | P (two-tailed) | P value |
|------------------|---------|-------------------------|-----------|----------------|---------|
| I-309            | 0,3912  | 0,01311 to 0,6714       | 0,153     | 0,0436         | *       |
| FGF-6            | -0,4559 | -0,7125 to -0,09175     | 0,2078    | 0,0169         | *       |
| CD4/CD8 ratio vs | r       | 95% confidence interval | R squared | P (two-tailed) | P value |
| IL-10            | -0,6148 | -0,8064 to -0,3064      | 0,378     | 0,0006         | ***     |
| HGF              | -0,485  | -0,7304 to -0,1287      | 0,2353    | 0,0103         | *       |
| Eotaxin-2        | -0,48   | -0,7273 to -0,1223      | 0,2304    | 0,0113         | *       |
| IGFBP-1          | -0,4499 | -0,7087 to -0,08426     | 0,2024    | 0,0185         | *       |
| IGFBP-3          | -0,3976 | -0,6756 to -0,02074     | 0,1581    | 0,04           | *       |
| IGF-I            | 0,4114  | 0,03725 to 0,6844       | 0,1693    | 0,033          | *       |
| Flt-3 Ligand     | 0,4896  | 0,1347 to 0,7332        | 0,2397    | 0,0095         | **      |
| IP-10            | 0,515   | 0,1678 to 0,7485        | 0,2652    | 0,006          | **      |
| RANTES           | 0,6918  | 0,4230 to 0,8487        | 0,4786    | <0,0001        | ****    |
