# Supplementary material for: Cytokines and Lymphoid Populations as Potential Biomarkers in Locally and Borderline Pancreatic Adenocarcinoma
Source: MDPI journal article supplement (doi:10.3390/cancers14235993), 2022-12-05
Supplement: s1 [file s1]

**Supplementary Table S1: Antibodies used for flow cytometry and IHQ analyses**

| Antibody              | Clone  | Dilution and retrieval if needed | Reference    | Company                             |
|-----------------------|--------|----------------------------------|--------------|-------------------------------------|
| CD11b-PerCP-Cy5       | M1/70  | 1:52                             | 65-0112-U100 | Tonbo Biosciences (California, USA) |
| CD14-Violet fluor 450 | 61D3   | 1:40                             | 75-0149-T100 | Tonbo Biosciences                   |
| CD19-PE               | SJ25C1 | 1:50                             | 50-0198-T100 | Tonbo Biosciences                   |
| CD4-FITC              | M-T466 | 1:50                             | 130-113-253  | Miltenyi                            |
| CD27-PE               | O323   | 1:50                             | 50-0279-T100 | Tonbo Biosciences                   |
| CD28-PE-Cy7           | CD28.2 | 1:50                             | 302926       | BioLegend                           |
| CD3-APC               | REA613 | 1:50                             | 130-113-135  | Miltenyi                            |
| CD8- APC-Cy7          | RFT-8  | 1:50                             | A15448       | Life Technologies (California, USA) |
| CD4                   | EP204  | Ready-to-use<br>pH 6,<br>20 min  | MAD-000600QD | Vitro                               |
| CD8                   | SP57   | Ready-to-use<br>pH 6,<br>20 min  | 790-4460     | Roche                               |
